# Supplementary material for: Multiplexed microRNA expression profiling by combined asymmetric PCR and label-free detection using silicon photonic sensor arrays
Source: Royal Society of Chemistry journal article supplement (doi:10.1039/c8ay00190a), 2018-01-01
Supplement: c8ay00190a1.pdf [file c8ay00190a1.pdf]

## Supporting Information

# Multiplexed microRNA Expression Profiling by Combined Asymmetric PCR and Label-Free Detection using Silicon Photonic Sensor Arrays

Richard M. Graybill,<sup>1</sup> Maria C. Cardenosa-Rubio,<sup>1,2</sup> Hongwei Yang,<sup>3,4</sup> Mark D. Johnson,<sup>3,4</sup> and Ryan C. Bailey<sup>1,2\*</sup>

<sup>1</sup>*Department of Chemistry, University of Illinois at Urbana-Champaign, 600 S. Matthews Ave., Urbana, IL 61801, USA*

<sup>2</sup>*Department of Chemistry, University of Michigan, 930 N. University Ave. Ann Arbor, MI 48104, USA*

<sup>3</sup>*Department of Neurological Surgery, Brigham and Women's Hospital and Harvard Medical School, Boston, MA 02215, USA*

<sup>4</sup>*Department of Neurological Surgery, University of Massachusetts Medical School, 55 Lake Avenue North, Worcester, MA 01655, USA*

### Table of Contents:

|                                                                                  |    |
|----------------------------------------------------------------------------------|----|
| <b>Table S1.</b> Summary of nucleic acid sequences .....                         | S2 |
| <b>Table S2.</b> Details on fluid flow conditions.....                           | S3 |
| <b>Table S3.</b> Patient Information.....                                        | S3 |
| <b>Table S4.</b> Fold changes presented in heat map.....                         | S4 |
| <b>Figure S1.</b> Amplification validation of miRNA targets .....                | S5 |
| <b>Figure S2-22.</b> aPCR amplification plots obtained from patient samples..... | S6 |

**Table S1.** Summary of nucleic acid sequences

|                            | Sequence (5'-3')                                                      |
|----------------------------|-----------------------------------------------------------------------|
| hsa miRNA-let7f            | UGAGGUAGUAGAUUGUAUAGUU                                                |
| hsa miRNA-219              | UGAUUGUCCAAACGCAAUUCU                                                 |
| hsa miRNA-10b              | UACCCUGUAGAACCGAAUUUGUG                                               |
| hsa miRNA-29a              | UAGCACCAUCUGAAAUCGGUUA                                                |
| hsa miRNA-335              | UCAAGAGCAAUAACGAAAAAUGU                                               |
| hsa miRNA-124a             | UAAGGCACGCGGUGAAUGCC                                                  |
| hsa miRNA-222              | AGCUACAUCUGGCUACUGGGUCUC                                              |
| hsa miRNA-34a              | UGGCAGUGUCUUAGCUGGUUGU                                                |
| hsa miRNA-155              | UUAAUGCUAAUCGUGAUAGGGGU                                               |
| Conserved Stem Loop Primer | GTCGTATCCAGTGCAGGGTCCGAGGTATTCGCACTGGAT... miRNA<br>specific overhang |
| miR-let7f SLP overhang     | AACTATAC                                                              |
| miR-219 SLP overhang       | AGAATTG                                                               |
| miR-10b SLP overhang       | CACAAATTC                                                             |
| miR-29a SLP overhang       | TAACCG                                                                |
| miR-335 SLP overhang       | ACATTTTT                                                              |
| miR-124a SLP overhang      | GGCATTC                                                               |
| miR-222 SLP overhang       | GAGACCC                                                               |
| miR-34a SLP overhang       | ACAACCA                                                               |
| miR-155 SLP overhang       | ACCCCT                                                                |
| Conserved reverse primer   | GTGCAGGGTCCGAGGT                                                      |
| miR-let7f forward primer   | CGCGCTGAGGTAGTAGATT                                                   |
| miR-219 forward primer     | CGCGTGATTGTCCAAACG                                                    |
| miR-10b forward primer     | GCGTACCCTGGTAGAACC                                                    |
| miR-29a forward primer     | CGCTAGCACCATCTGAAAT                                                   |
| miR-335 forward primer     | CGCGTCAAGAGCAATAACG                                                   |
| miR-124a forward primer    | CGTAAGGCACGCGGT                                                       |
| miR-222 forward primer     | CGAGCTACATCTGGCTACT                                                   |
| miR-34a forward primer     | GCGTGGCAGTGTCTTAGC                                                    |
| miR-155 forward primer     | CGCGTTAATGCTAATCGTGAT                                                 |

**Table S2.** Details on fluid flow conditions used in the assay

| Step                 | Flow Rate ( $\mu\text{L}/\text{min}$ ) | Duration (min) |
|----------------------|----------------------------------------|----------------|
| Hybridization Buffer | 20                                     | 5              |
| RT-aPCR Product      | 20                                     | 15             |
| Hybridization Buffer | 20                                     | 5              |

**Table S3.** Research Subject Information

| Subject | Gender | Age | Cancer type          |
|---------|--------|-----|----------------------|
| A       | M      | 62  | Glioma – grade IV    |
| B       | M      | 42  | Glioma – grade IV    |
| C       | M      | 47  | Glioma – grade IV    |
| D       | F      | 52  | Glioma – grade II    |
| E       | F      | 67  | Glioma – grade IV    |
| F       | F      | 75  | Glioma – grade IV    |
| G       | F      | 29  | Glioma – grade III   |
| H       | F      | 48  | Glioma – grade IV    |
| I       | F      | 37  | Glioma – grade III   |
| J       | F      | 35  | Glioma – grade III   |
| K       | M      | 26  | Glioma – grade IV    |
| L       | M      | 38  | Glioma – grade IV    |
| M       | F      | 67  | Glioma – grade IV    |
| N       | M      | 25  | Glioma – grade III   |
| O       | F      | 27  | Glioma – grade II    |
| P       | M      | 30  | Glioma – grade III   |
| Q       | M      | 51  | Glioma – grade IV    |
| R       | F      | 63  | Meningioma – grade I |
| S       | F      | 69  | Glioma – grade IV    |
| T       | F      | 74  | Meningioma – grade I |

**Table S4.** Fold Changes Presented in heat map (log 2)

| Subject | let<br>7f | miR-<br>10b | miR-<br>29a | miR-<br>34a | miR-<br>124a | miR-<br>155 | miR-<br>219 | miR-<br>222 | miR-<br>335 |
|---------|-----------|-------------|-------------|-------------|--------------|-------------|-------------|-------------|-------------|
| A       | 0.83      | 0.68        | -0.92       | -1.18       | -2.76        | -1.81       | -1.19       | -1.78       | -1.27       |
| B       | 0.73      | 0.55        | 0.09        | 0.05        | 0.12         | -0.7        | 0.61        | 3.02        | 0.08        |
| C       | 0.8       | 0.88        | -0.14       | -0.27       | 0.91         | 2.42        | 0.71        | 1.45        | 0.07        |
| D       | -0.03     | 0.7         | -1.65       | -2.97       | -0.08        | 0.73        | 0.53        | 1.7         | 0.07        |
| E       | -3.1      | -2.95       | -2.63       | -2.44       | 0.11         | 1.29        | 0.27        | 8.05        | -6.21       |
| F       | -3.38     | -3.72       | -3.31       | -2.62       | -0.02        | 1.96        | -0.01       | 1.87        | 0.07        |
| G       | -3.09     | -1.35       | -2.89       | -2.51       | -1.89        | 1.03        | -0.3        | 0.04        | 0.1         |
| H       | -2.6      | 0.23        | -2.22       | -0.74       | 0.81         | 2.98        | 0.84        | 2.67        | -0.03       |
| I       | -1.71     | -0.43       | -1.8        | -2.85       | -2.02        | 1.68        | 0.05        | 2.07        | -2.25       |
| J       | 1.21      | 1.43        | 1           | 1.66        | 1.51         | 3.6         | 2.86        | 4.32        | -0.68       |
| K       | 2.35      | 3.76        | 3.9         | 1.15        | 4.17         | 8.02        | 6.86        | 9.44        | 1.95        |
| L       | 3.36      | 5.68        | 5.42        | 2.1         | 6.3          | 9.08        | 8.14        | 11.67       | 0.91        |
| M       | 0.73      | 0.94        | 1.08        | 0.76        | 2.09         | 3.7         | 3.79        | 3.9         | -2.51       |
| N       | 0.69      | 1.46        | 1.38        | 0.88        | 2.23         | 3.14        | 1.54        | 3.15        | -7.03       |
| O       | 0.99      | 1.23        | 1.19        | 0.61        | 0.97         | -0.38       | -1.24       | 0.86        | -6.44       |
| P       | 2.73      | 5.46        | 1.97        | 0.32        | 6.23         | 8.51        | 3.54        | 6.45        | 5.05        |
| Q       | 0.11      | 0.83        | 0.17        | 2.35        | -0.51        | 3.73        | 4.32        | 7.05        | -4.29       |
| R       | 1.94      | 1.68        | 2.6         | -1.37       | -1.76        | 4.4         | 5.38        | 9.48        | -1.73       |
| S       | 1.33      | 0.98        | 1.16        | -2.98       | 0.31         | 4.59        | -0.13       | 6.27        | -3.55       |
| T       | 0.37      | 0.86        | 0.83        | -1.21       | -1.1         | 4.38        | 5.01        | 7.85        | -1.36       |

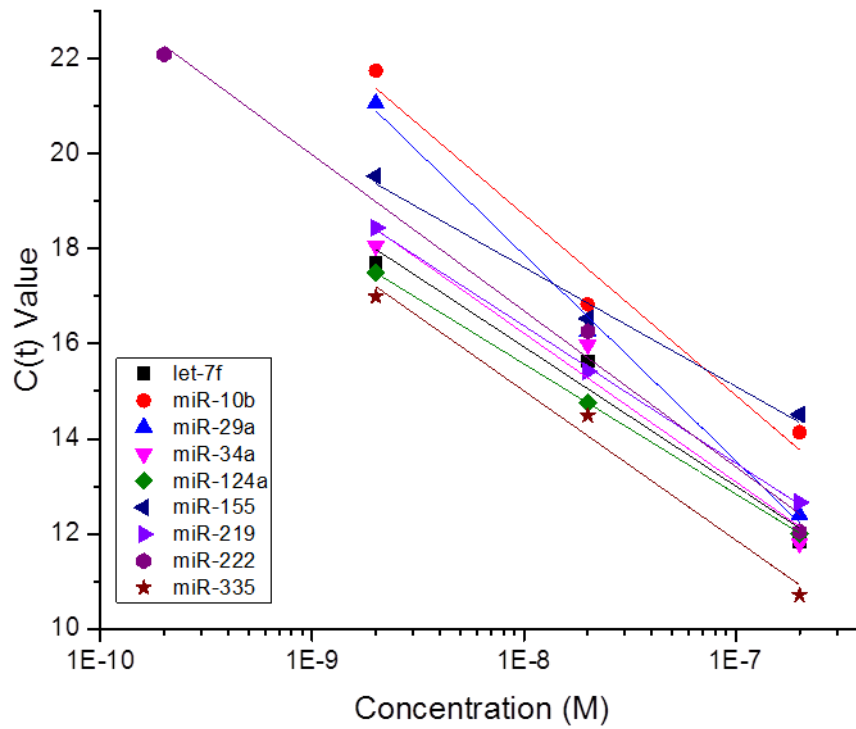

**Figure S1.** Amplification validation of miRNA targets. In order to prove linear amplification of all miRNA targets, samples of each target were subjected to the aPCR-microring assay at varying concentrations using a stem loop primer concentration of 200  $\mu$ M. The results validated the designed primer sets by displaying log-linear amplification profiles.

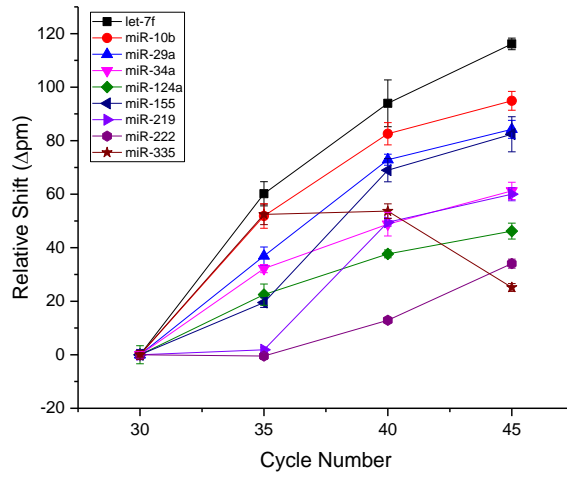

**Figure S2.** Amplification traces obtained using a 10 ng input for a pooled healthy RNA sample.

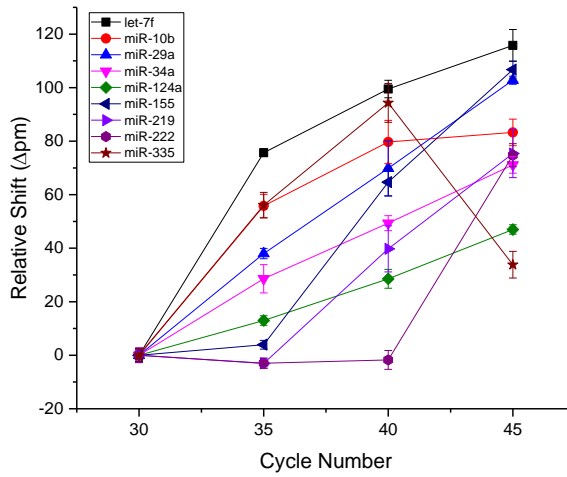

**Figure S3.** Amplification traces obtained using a 10 ng input for Subject A.

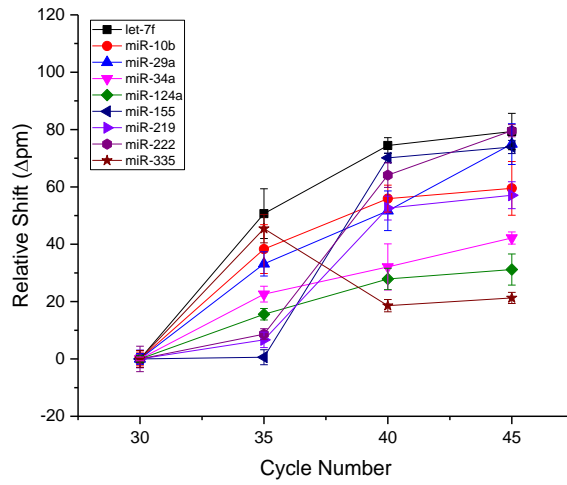

Figure S4. Amplification traces obtained using a 10 ng input for Subject B.

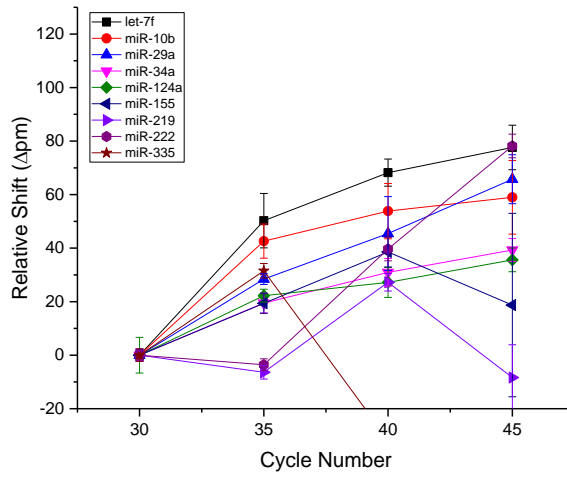

Figure S5. Amplification traces obtained using a 10 ng input for Subject C.

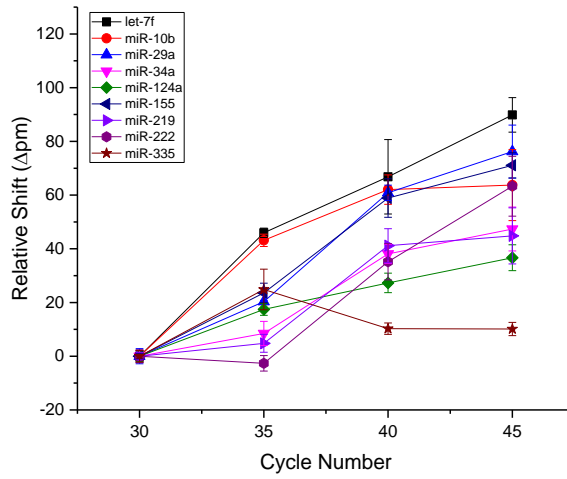

**Figure S6.** Amplification traces obtained using a 10 ng input for Subject D.

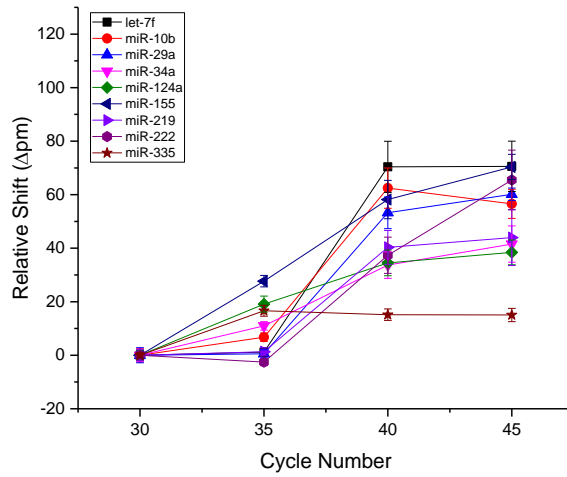

**Figure S7.** Amplification traces obtained using a 10 ng input for Subject E.



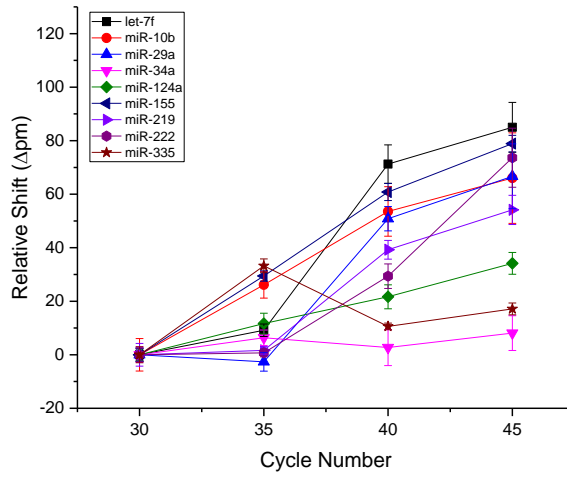

**Figure S8.** Amplification traces obtained using a 10 ng input for Subject F.

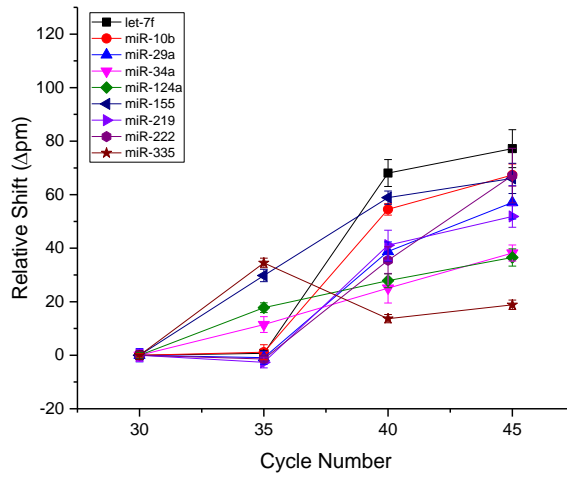

**Figure S9.** Amplification traces obtained using a 10 ng input for Subject G.

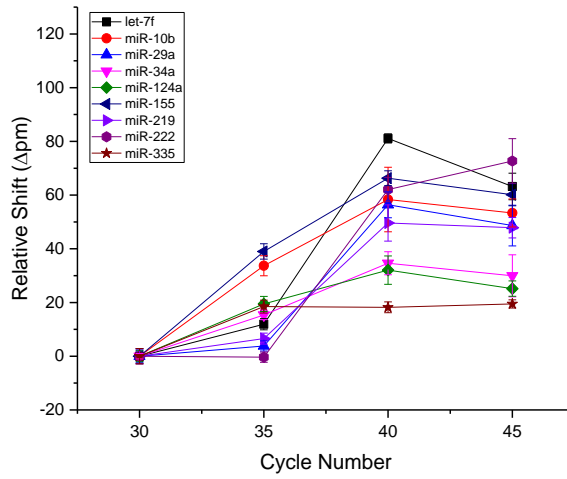

**Figure S10.** Amplification traces obtained using a 10 ng input for Subject H.

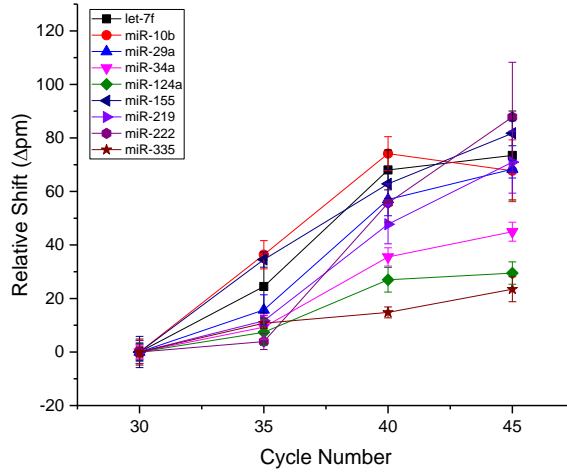

**Figure S11.** Amplification traces obtained using a 10 ng input for Subject I.

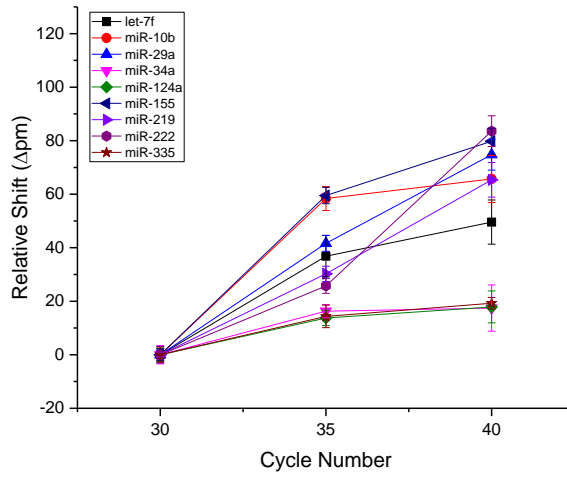

Figure S12. Amplification traces obtained using a 10 ng input for Subject J.

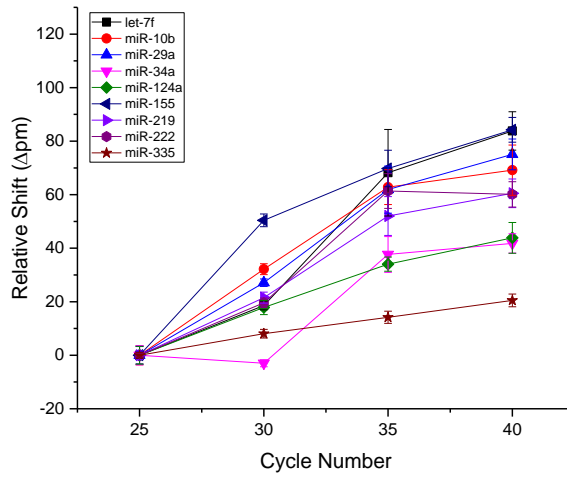

Figure S13. Amplification traces obtained using a 10 ng input for Subject K.

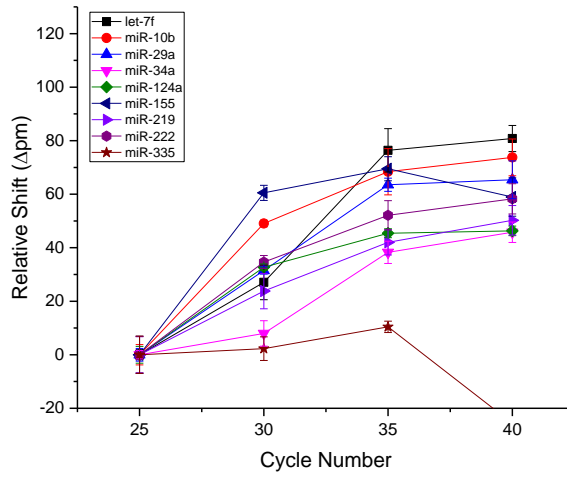

Figure S14. Amplification traces obtained using a 10 ng input for Subject L.

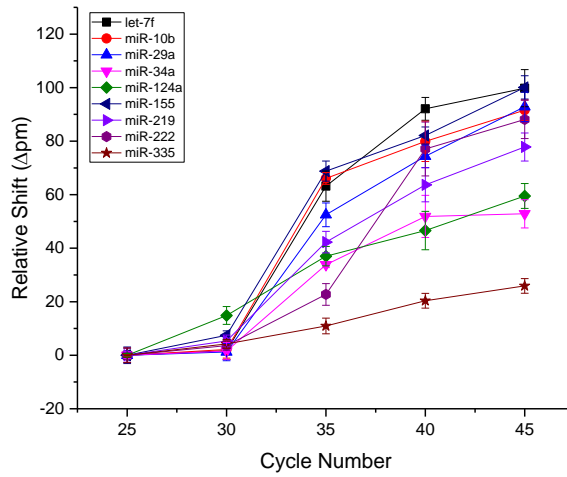

Figure S15. Amplification traces obtained using a 10 ng input for Subject M.

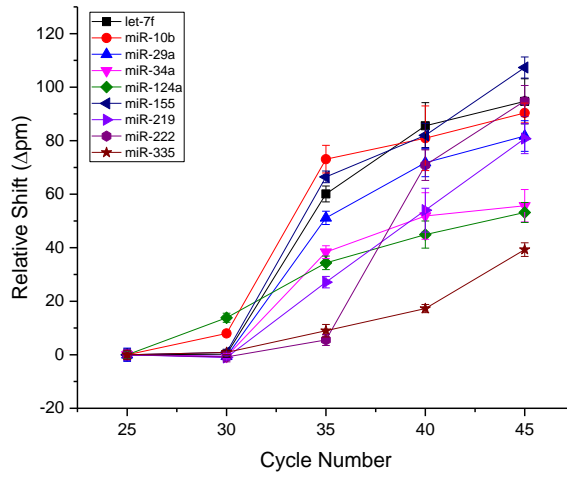

Figure S16. Amplification traces obtained using a 10 ng input for Subject N.

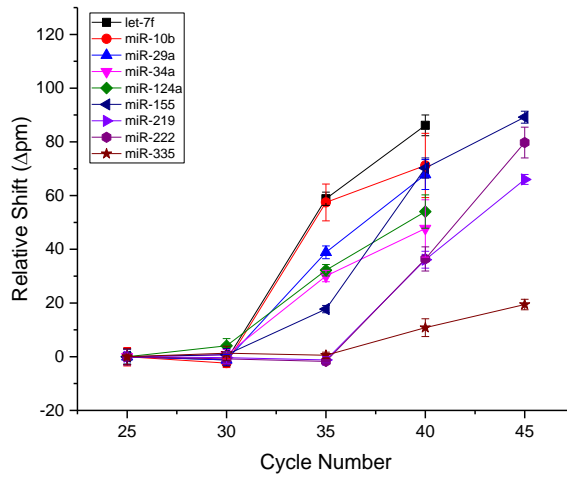

Figure S17. Amplification traces obtained using a 10 ng input for Subject O.

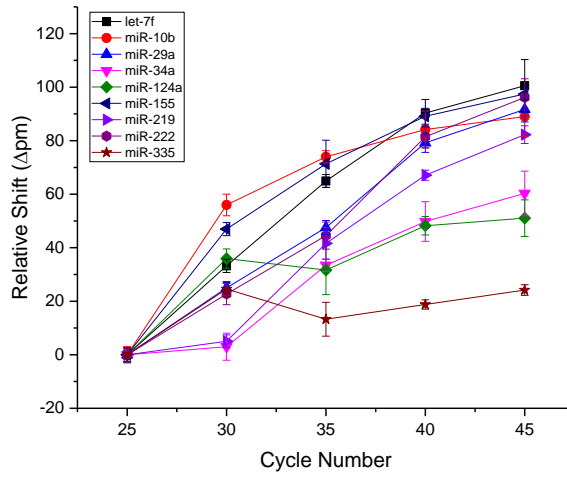

Figure S18. Amplification traces obtained using a 10 ng input for Subject P.

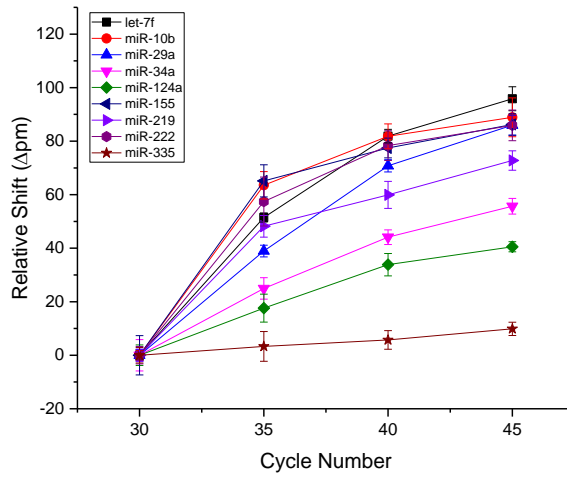

Figure S19. Amplification traces obtained using a 10 ng input for Subject Q.

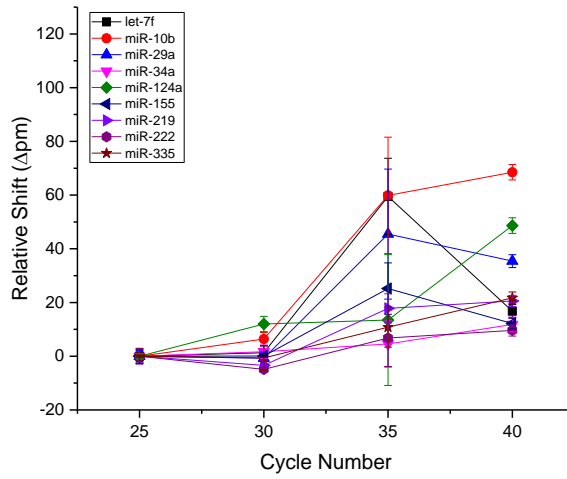

Figure S20. Amplification traces obtained using a 10 ng input for Subject R.

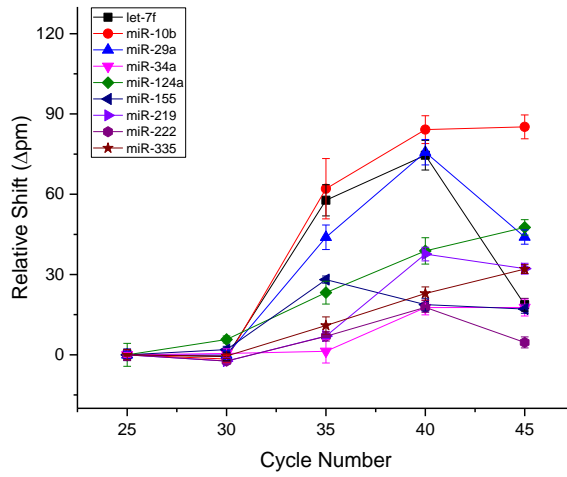

Figure S21. Amplification traces obtained using a 10 ng input for Subject S.

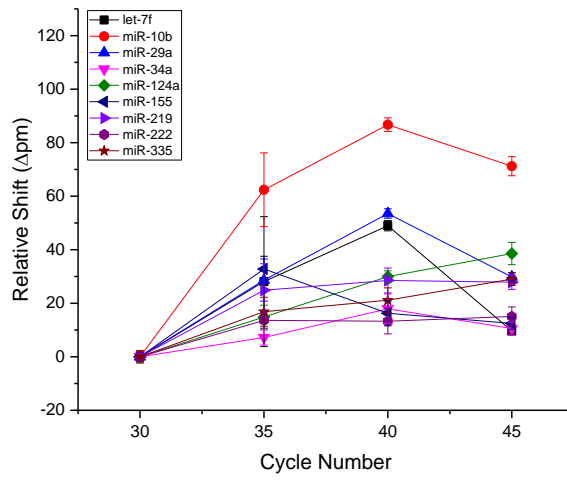

**Figure S22.** Amplification traces obtained using a 10 ng input for Subject T.
